# Supplementary material
Source: PubMed Central journal article supplement (PMC8641322)
Supplement: tpmd201441.SD1.pdf [file tpmd201441.SD1.pdf]

**Supplementary Table 1. Characteristics of study in the endpoint.**

|                               | <b>Total (n=410,208)</b> | <b>DM (n=136,736)</b> | <b>Non-DM (n=273,472)</b> | <b>p-value</b> |
|-------------------------------|--------------------------|-----------------------|---------------------------|----------------|
| <b>NTM</b>                    |                          |                       |                           | <0.01*         |
| Without                       | 409,813 (99.90)          | 136,571 (99.88)       | 273,242 (99.92)           |                |
| With                          | 395 (0.10)               | 165 (0.12)            | 230 (0.08)                |                |
| <b>NTM subgroup</b>           |                          |                       |                           | <0.01*         |
| Without                       | 409,813 (99.90)          | 136,571 (99.88)       | 273,242 (99.92)           |                |
| Pulmonary                     | 189 (0.05)               | 70 (0.05)             | 119 (0.044)               |                |
| Cutaneous                     | 8 (0.00)                 | 3 (0.002)             | 5 (0.002)                 |                |
| Disseminated                  | 17 (0.00)                | 5 (0.004)             | 12 (0.004)                |                |
| Other specified               | 17 (0.00)                | 12 (0.009)            | 5 (0.002)                 |                |
| Unspecified                   | 164 (0.04)               | 75 (0.055)            | 89 (0.033)                |                |
| <b>Gender</b>                 |                          |                       |                           | 1.00           |
| Male                          | 202,764 (49.43)          | 67,588 (49.43)        | 135,176 (49.43)           |                |
| Female                        | 207,444 (50.57)          | 69,148 (50.57)        | 138,296 (50.57)           |                |
| <b>Age (yrs)</b>              | 69.37 ± 13.38            | 68.43 ± 15.54         | 69.83 ± 12.07             | <0.01*         |
| <b>Age groups (yrs)</b>       |                          |                       |                           | <0.01*         |
| 18-44                         | 25,826 (6.30)            | 5,522 (4.04)          | 20,304 (7.42)             |                |
| 45-64                         | 113,002 (27.55)          | 35,899 (26.25)        | 77,103 (28.19)            |                |
| ≥ 65                          | 271,380 (66.16)          | 95,315 (69.71)        | 176,065 (64.38)           |                |
| <b>Insured premium (NT\$)</b> |                          |                       |                           | <0.01*         |
| <18,000                       | 405,604 (98.88)          | 135,620 (99.18)       | 269,984 (98.72)           |                |
| 18,000-34,999                 | 3,843 (0.94)             | 991 (0.72)            | 2,852 (1.04)              |                |
| ≥ 35,000                      | 761 (0.19)               | 125 (0.09)            | 636 (0.23)                |                |
| <b>CCI_R</b>                  | 1.77 ± 2.95              | 1.81 ± 3.40           | 1.74 ± 2.72               | <0.01*         |
| <b>Season</b>                 |                          |                       |                           | <0.01*         |
| Spring                        | 101,739 (24.80)          | 33,714 (24.66)        | 68,025 (24.87)            |                |
| Summer                        | 99,980 (24.37)           | 32,578 (23.83)        | 67,402 (24.65)            |                |
| Autumn                        | 103,450 (25.22)          | 34,306 (25.09)        | 69,144 (25.28)            |                |
| Winter                        | 105,039 (25.61)          | 36,138 (26.43)        | 68,901 (25.19)            |                |
| <b>Location</b>               |                          |                       |                           | <0.01*         |
| Northern Taiwan               | 158,960 (38.75)          | 51,424 (37.61)        | 107,536 (39.32)           |                |
| Middle Taiwan                 | 113,733 (27.73)          | 37,181 (27.19)        | 76,552 (27.99)            |                |
| Southern Taiwan               | 110,076 (26.83)          | 39,452 (28.85)        | 70,624 (25.82)            |                |
| Eastern Taiwan                | 25,608 (6.24)            | 8,066 (5.90)          | 17,542 (6.41)             |                |
| Outlets islands               | 1,831 (0.45)             | 613 (0.45)            | 1,218 (0.45)              |                |
| <b>Urbanization level</b>     |                          |                       |                           | <0.01*         |
| 1 (The highest)               | 132,436 (32.29)          | 44,538 (32.57)        | 87,898 (32.14)            |                |

|                      |                 |                |                 |        |
|----------------------|-----------------|----------------|-----------------|--------|
| 2                    | 182,926 (44.59) | 61,104 (44.69) | 121,822 (44.55) |        |
| 3                    | 27,673 (6.75)   | 9,064 (6.63)   | 18,609 (6.80)   |        |
| 4 (The lowest)       | 67,173 (16.38)  | 22,030 (16.11) | 45,143 (16.51)  |        |
| <b>Level of care</b> |                 |                |                 | <0.01* |
| Hospital center      | 141,757 (34.56) | 45,826 (33.51) | 95,931 (35.08)  |        |
| Regional hospital    | 162,287 (39.56) | 56,043 (40.99) | 106,244 (38.85) |        |
| Local hospital       | 106,164 (25.88) | 34,867 (25.50) | 71,297 (26.07)  |        |

---

DM, diabetes mellitus; NTM, nontuberculous mycobacterium; CCI\_R, Charlson comorbidity index revised (CCI removed DM); SD, standard derivation. **P: Chi-square / Fisher exact test on category variables and t-test on continue variables.** \* $p < 0.05$

**Supplementary Table 2. Multivariate Cox-regression analysis of DM subtype associated with infection of NTM.**

| <b>DM Types</b>               | <b>Populations</b> | <b>Events</b> | <b>PYs</b>   | <b>Rate (per 105 PYs)</b> | <b>aHR (95%CI)</b> | <b>p-value</b> |
|-------------------------------|--------------------|---------------|--------------|---------------------------|--------------------|----------------|
| <b>Non-DM</b>                 | 273,472            | 230           | 3,524,118.09 | 6.53                      | Ref.               |                |
| <b>DM</b>                     | 136,736            | 165           | 1,754,087.97 | 9.41                      | 1.43 (1.17-1.74)   | <0.01*         |
| T1DM                          | 2,582              | 3             | 33,152.26    | 9.05                      | 1.37 (1.13-1.67)   | <0.01*         |
| T2DM                          | 123,666            | 150           | 1,586,397.16 | 9.46                      | 1.44 (1.18-1.75)   | <0.01*         |
| Unknown                       | 10,488             | 12            | 134,538.55   | 8.92                      | 1.35 (1.11-1.65)   | <0.01*         |
| <b>Frequency of DM before</b> |                    |               |              |                           |                    |                |
| <b>NTM</b>                    |                    |               |              |                           |                    |                |
| 3                             | 31,056             | 33            | 398,396.11   | 8.28                      | 1.26 (1.03-1.54)   | 0.02*          |
| 4-12                          | 58,783             | 72            | 754,086.91   | 9.55                      | 1.45 (1.19-1.77)   | <0.01*         |
| > 12                          | 46,897             | 60            | 601,604.95   | 9.97                      | 1.51 (1.24-1.85)   | <0.01*         |
| <b>From first to last DM</b>  |                    |               |              |                           |                    |                |
| <b>diagnosis before NTM</b>   |                    |               |              |                           |                    |                |
| < 1 year                      | 22,450             | 25            | 287,995.11   | 8.68                      | 1.32 (1.07-1.60)   | <0.01*         |
| ≥ 1 year, < 5 years           | 78,622             | 93            | 1,008,522.43 | 9.22                      | 1.40 (1.14-1.71)   | <0.01*         |
| ≥ 5 years                     | 35,664             | 47            | 457,570.43   | 10.27                     | 1.54 (1.28-1.90)   | <0.01*         |

NTM, nontuberculous mycobacterium; DM, diabetes mellitus; PYs, person-years; aHR, Adjusted hazard ratio; CI = confidence interval; T1DM; Type 1 diabetes mellitus; T2DM, Type 2 diabetes mellitus. Adjusted for the variables listed in Table 3. \* $p < 0.05$ .

**Supplementary Table 3. The risk of NTM aged 18 and over stratified by DM.**

| <b>In the tracking of x year(s)</b> | <b>DM (n= 136,736)</b> | <b>Non-DM (n = 273,472)</b> | <b>Log-rank <i>p</i>-value</b> |
|-------------------------------------|------------------------|-----------------------------|--------------------------------|
| <b>1</b>                            | 5                      | 1                           | 0.01*                          |
| <b>2</b>                            | 13                     | 9                           | <0.01*                         |
| <b>3</b>                            | 19                     | 15                          | 0.04*                          |
| <b>4</b>                            | 24                     | 24                          | 0.02*                          |
| <b>5</b>                            | 41                     | 35                          | 0.01*                          |
| <b>6</b>                            | 50                     | 54                          | 0.04*                          |
| <b>7</b>                            | 62                     | 68                          | 0.03*                          |
| <b>8</b>                            | 77                     | 89                          | 0.01*                          |
| <b>9</b>                            | 85                     | 103                         | <0.01*                         |
| <b>10</b>                           | 98                     | 118                         | <0.01*                         |
| <b>11</b>                           | 119                    | 142                         | <0.01*                         |
| <b>12</b>                           | 138                    | 159                         | <0.01*                         |
| <b>13</b>                           | 145                    | 183                         | <0.01*                         |
| <b>14</b>                           | 152                    | 201                         | <0.01*                         |
| <b>15</b>                           | 160                    | 222                         | <0.01*                         |
| <b>16</b>                           | 165                    | 230                         | <0.01*                         |

NTM, nontuberculous mycobacterium; DM, diabetes mellitus.

**Supplementary Table 4. Multivariate Cox-regression analysis of patient characteristics associated with DM-related infection of NTM.**

| Stratified variables          | DM vs. Non-DM    |                 |
|-------------------------------|------------------|-----------------|
|                               | aHR (95% CI)     | <i>p</i> -value |
| <b>Gender</b>                 |                  |                 |
| Male                          | 1.45 (1.19-1.77) | <0.01*          |
| Female                        | 1.41 (1.15-1.72) | <0.01           |
| <b>Age group (yrs)</b>        |                  |                 |
| 18-44                         | 1.37 (1.12-1.67) | <0.01*          |
| 45-64                         | 1.40 (1.15-1.71) | <0.01*          |
| ≥ 65                          | 1.44 (1.18-1.75) | <0.01*          |
| <b>Insured premium (NT\$)</b> |                  |                 |
| <18,000                       | 1.43 (1.18-1.75) | <0.01*          |
| 18,000-34,999                 | -                | -               |
| ≥ 35,000                      | -                | -               |
| <b>Season</b>                 |                  |                 |
| Spring                        | 1.54 (1.26-1.88) | <0.01*          |
| Summer                        | 1.52 (1.24-1.85) | <0.01*          |
| Autumn                        | 1.25 (1.03-1.52) | 0.02*           |
| Winter                        | 1.41 (1.16-1.72) | <0.01*          |
| <b>Urbanization level</b>     |                  |                 |
| 1 (The highest)               | 1.47 (1.21-1.80) | <0.01*          |
| 2                             | 1.42 (1.16-1.73) | <0.01*          |
| 3                             | 1.39 (1.14-1.69) | <0.01*          |
| 4 (The lowest)                | 1.25 (1.03-1.53) | 0.02*           |
| <b>Level of care</b>          |                  |                 |
| Hospital center               | 1.55 (1.27-1.89) | <0.01*          |
| Regional hospital             | 1.40 (1.15-1.71) | <0.01*          |
| Local hospital                | 1.27 (1.05-1.55) | 0.01*           |

NTM, nontuberculous mycobacterium; DM, diabetes mellitus; PYs, person-years; aHR, adjusted hazard ratio; CI, confidence interval. Adjusted for the variables listed in Table 3. \* $p < 0.05$
